# Supplementary material for: Activated Eosinophils Predict Longer Progression-Free Survival under Immune Checkpoint Inhibition in Melanoma
Source: MDPI journal article supplement (doi:10.3390/cancers14225676), 2022-11-18
Supplement: s1 [file s1]

Archive with 13 entries (13 files):
- cancers-2026766-supplementary_update.pdf
- Supplementary Figure S1.pdf
- Supplementary Figure S10.pdf
- Supplementary Figure S11.pdf
- Supplementary Figure S12.pdf
- Supplementary Figure S2.pdf
- Supplementary Figure S3.pdf
- Supplementary Figure S4.pdf
- Supplementary Figure S5.pdf
- Supplementary Figure S6.pdf
- Supplementary Figure S7.pdf
- Supplementary Figure S8.pdf
- Supplementary Figure S9.pdf
