# Supplementary material for: Activated Eosinophils Predict Longer Progression-Free Survival under Immune Checkpoint Inhibition in Melanoma
Source: MDPI journal article supplement (doi:10.3390/cancers14225676), 2022-11-18

(a) Expression of Siglec-8 in melanoma-associated metastases

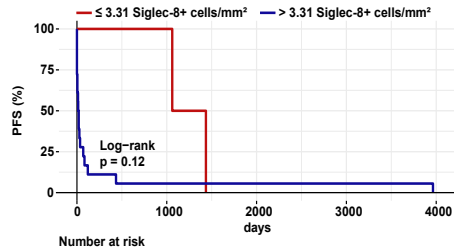

(b) Expression of EPX in melanoma-associated metastases

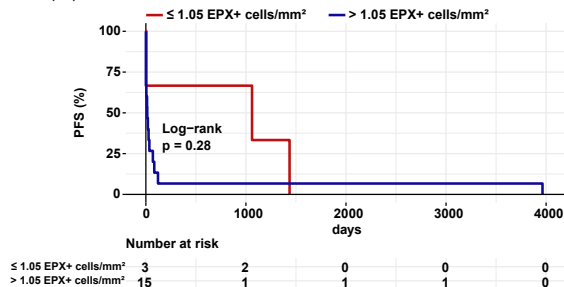

(c) Expression of ECP in melanoma-associated metastases

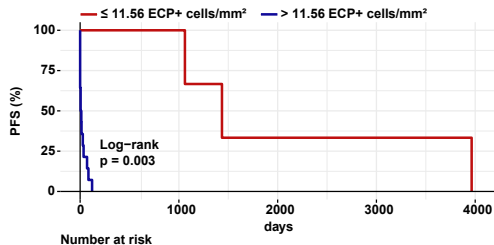

(d) Expression of CD8 in melanoma-associated metastases

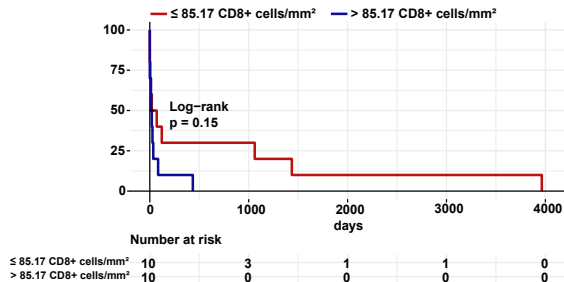

Supplement: s1 [file s1]
