# Supplementary material for: Activated Eosinophils Predict Longer Progression-Free Survival under Immune Checkpoint Inhibition in Melanoma
Source: MDPI journal article supplement (doi:10.3390/cancers14225676), 2022-11-18

**(a) Changes in EPX serum levels during ICI treatment**

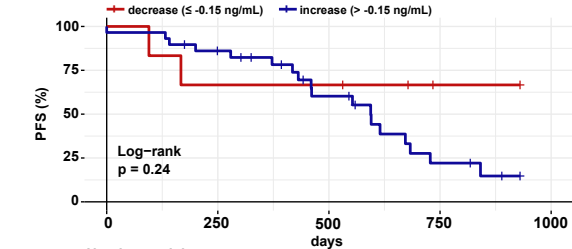

**(b) Changes in EPX serum levels during ICI treatment**

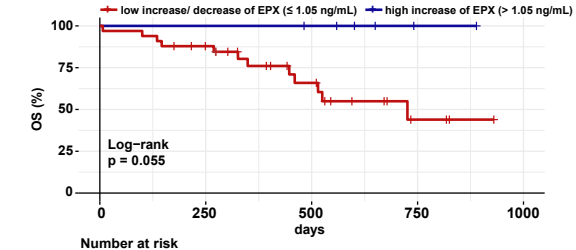

Supplement: s1 [file s1]
