# Supplementary material for: Activated Eosinophils Predict Longer Progression-Free Survival under Immune Checkpoint Inhibition in Melanoma
Source: MDPI journal article supplement (doi:10.3390/cancers14225676), 2022-11-18
Supplement: s1 [file s1]

**(a) Expression of Siglec-8 in primary melanomas**

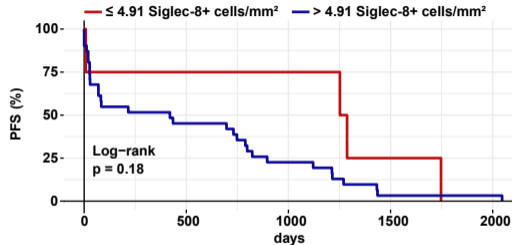

**(b) Expression of EPX in primary melanomas**

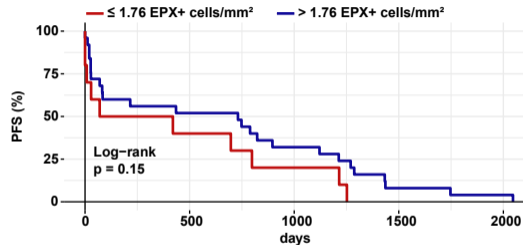

Number at risk

|                                             |    |    |   |   |   |
|---------------------------------------------|----|----|---|---|---|
| $\leq 4.91$ Siglec-8+ cells/mm <sup>2</sup> | 4  | 3  | 3 | 1 | 0 |
| $> 4.91$ Siglec-8+ cells/mm <sup>2</sup>    | 31 | 14 | 7 | 1 | 1 |

Number at risk

|                                        |    |    |   |   |   |
|----------------------------------------|----|----|---|---|---|
| $> 1.76$ EPX+ cells/mm <sup>2</sup>    | 25 | 13 | 8 | 2 | 1 |
| $\leq 1.76$ EPX+ cells/mm <sup>2</sup> | 10 | 4  | 2 | 0 | 0 |
