# Supplementary material for: Activated Eosinophils Predict Longer Progression-Free Survival under Immune Checkpoint Inhibition in Melanoma
Source: MDPI journal article supplement (doi:10.3390/cancers14225676), 2022-11-18
Supplement: s1 [file s1 › Supplementary Figure S8.pdf]

**(a)****Baseline serum levels of EPX**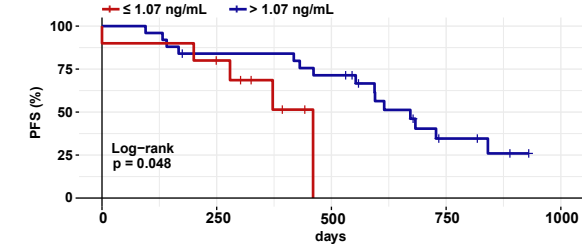

|              |    |    |    |   |   |
|--------------|----|----|----|---|---|
| > 1.07 ng/mL | 25 | 20 | 17 | 5 | 0 |
| ≤ 1.07 ng/mL | 10 | 7  | 0  | 0 | 0 |

**(b)****EPX serum levels before the 4th infusion cycle**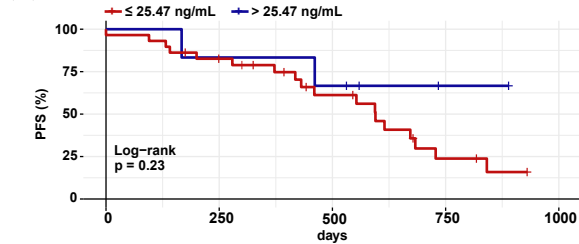

|               |    |    |    |   |   |
|---------------|----|----|----|---|---|
| > 25.47 ng/mL | 6  | 5  | 4  | 1 | 0 |
| ≤ 25.47 ng/mL | 29 | 22 | 13 | 4 | 0 |
